# Supplementary material for: Identification of B-Cell Linear Epitopes in the Nucleocapsid (N) Protein B-Cell Linear Epitopes Conserved among the Main SARS-CoV-2 Variants
Source: MDPI journal article supplement (doi:10.3390/v15040923), 2023-04-06
Supplement: s1 [file s1]

**Table S1: Frequency of N protein key mutations across the SARS-CoV-2 major variants.**

| Variant   | Mutations |       |        |          |       |       |       |       |       |       |       |       |       |       |       |       |
|-----------|-----------|-------|--------|----------|-------|-------|-------|-------|-------|-------|-------|-------|-------|-------|-------|-------|
|           | D3L       | Q9L   | P13L   | Del31/33 | D63G  | P80R  | E136D | R203M | R203K | G204R | T205I | G215C | L230F | S235F | D377Y | S413R |
| Alpha     | 98,2%     | 0,1%  | 0,1%   |          | 0,1%  |       | 0,2%  | 0,1%  | 98,1% | 91,1% | 0,1%  | 0,1%  | 0,1%  | 98,9% | 0,1%  |       |
| Beta      | 0,1%      | 0,1%  | 0,6%   |          | 0,1%  | 0,1%  | 0,1%  | 0,1%  | 0,1%  | 0,1%  | 97,8% | 0,1%  | 0,1%  | 0,1%  | 0,2%  |       |
| Gama      | 0,1%      |       | 0,1%   |          | 0,1%  | 99,2% | 0,1%  | 0,1%  | 95,2% | 95,6% | 0,2%  | 0,1%  | 0,1%  | 0,1%  | 0,7%  |       |
| Delta     | 0,1%      | 7,2%  | 0,1%   |          | 97,3% |       | 0,1%  | 99,0% | 0,1%  | 0,1%  | 0,1%  | 89,3% | 0,3%  |       | 98,1% | 0,1%  |
| Omicron   | 0,1%      |       | 97,9%  | 91,9%    | 0,1%  |       | 6,5%  | 0,1%  | 97,8% | 98,0% | 0,1%  | 0,1%  | 0,1%  |       | 0,1%  | 64,2% |
| XBB.15*   |           | 0,1%  | 99,6%  | 97,9%    | 0,1%  | 0,1%  | 0,1%  |       | 98,9% | 98,8% | 0,1%  |       | 0,1%  |       | 0,1%  | 98,2% |
| CH.1.1    |           |       | 99,4%  | 96,1%    |       | 0,1%  | 0,1%  |       | 98,2% | 98,3% | 0,1%  |       | 0,1%  |       |       | 98,2% |
| BA.2.75*  |           |       | 99,3%  | 92,7%    | 0,1%  |       | 0,1%  |       | 98,5% | 98,5% | 0,1%  |       | 0,1%  |       |       | 98,0% |
| BA.5*     |           |       | 98,1%  | 86,1%    | 0,1%  |       | 22,2% |       | 98,2% | 98,3% | 0,1%  |       | 0,1%  |       |       | 98,2% |
| BQ.1*     |           | 0,1%  | 99,5%  | 96,4%    | 0,1%  |       | 98,6% |       | 98,7% | 98,7% | 0,1%  |       | 0,1%  |       |       | 98,6% |
| BQ1.1.    |           | 0,1%  | 99,5%  | 96,2%    | 0,1%  |       | 98,6% |       | 98,7% | 98,8% | 0,1%  |       | 0,1%  |       |       | 98,6% |
| XBB.1     | 0,1%      | 0,1%  | 98,7%  | 94,4%    |       |       | 0,1%  |       | 99,3% | 99,3% | 0,1%  |       | 0,1%  |       |       | 98,1% |
| XBB.1.5   |           | 0,1%  | 99,6%  | 97,9%    | 0,1%  |       | 0,1%  |       | 99,1% | 99,0% | 0,1%  |       | 0,1%  |       |       | 98,1% |
| CH.1.1.1  |           |       | 99,3%  | 93,2%    |       |       | 0,1%  |       | 98,8% | 98,9% | 0,1%  |       | 0,1%  |       |       | 98,0% |
| BM.4.1    |           |       | 100,0% | 77,9%    |       |       |       |       | 97,4% | 98,7% |       |       |       |       |       | 94,8% |
| BM.4.1.1  |           |       | 98,7%  | 87,7%    |       |       |       |       | 99,0% | 99,0% |       |       |       |       |       | 99,0% |
| XBB.1.9   |           |       | 98,9%  | 94,8%    |       |       |       |       | 98,3% | 98,4% |       |       |       |       |       | 95,8% |
| B.1.617.2 | 0,1%      | 0,1%  | 0,1%   | 0,1%     | 93,2% | 0,1%  | 0,1%  | 97,2% | 0,1%  | 0,1%  | 0,1%  | 67,4% | 0,2%  | 0,1%  | 0,1%  | 0,1%  |
| P.1.1     | 0,8%      |       |        |          | 0,1%  | 99,2% |       | 0,2%  | 68,8% | 75,7% | 0,1%  |       | 0,2%  | 0,1%  | 1,0%  |       |
| BA.2      | 0,1%      |       | 98,8%  | 95,2%    | 0,1%  |       | 0,1%  | 0,1%  | 96,9% | 97,0% | 0,1%  | 0,1%  | 0,1%  |       |       | 97,5% |
| AY.43     | 0,1%      | 98,6% | 0,1%   | 0,1%     | 95,6% |       | 0,1%  | 99,3% | 0,1%  | 0,1%  | 0,1%  | 99,2% | 0,1%  | 0,1%  | 98,8% |       |
| AY.34.1   |           | 0,1%  | 0,1%   |          | 97,5% |       |       | 99,0% | 0,1%  | 0,1%  |       | 99,1% | 98,4% | 0,1%  | 96,9% |       |

The table indicates the frequencies of 16 key mutations described in the SARS-CoV-2 N protein (columns) across the previously Circulating Variants of Concern (Alpha, Beta, Gamma, and Delta), the Current Variants of Concern (Omicron, Omicron - XBB.1.5.X, Omicron – CH.1.1.X, Omicron – BA.2.75.X, Omicron – BA.5, Omicron BQ.1.X, BQ1.1, and XBB.1), the top 5 growing lineages in the world on 2023 February 27<sup>th</sup> (XBB.1.5, CH.1.1.1, BM.4.1, BM.4.1.1, XBB.1.9) and the top five most counted lineages in Brazil (B.1.617.2, P.1.1, BA.2, AY.43, AY.34.1). Values represent the frequency of each mutation among all reported isolates.
